# Supplementary material for: Giant magnetoresistance in non-magnetic phosphoric acid doped polyaniline silicon nanocomposites with higher magnetic field sensing sensitivity
Source: Royal Society of Chemistry journal article supplement (doi:10.1039/c3cp50698c), 2013-01-01
Supplement: c3cp50698c.pdf [file c3cp50698c.pdf]

Supporting Materials for

**Giant Magnetoresistance in Non-Magnetic Phosphoric Acid Doped  
Polyaniline Silicon Nanocomposites with Higher Magnetic Field Sensing  
Sensitivity**

Hongbo Gu,<sup>a,c</sup> Jiang Guo,<sup>a</sup> Huige Wei,<sup>a,b</sup> Yudong Huang,<sup>c</sup> Cunyu Zhao,<sup>d</sup> Ying Li,<sup>d</sup> Qingliu  
Wu,<sup>e</sup> Neel Haldolaarachchige,<sup>f</sup> David P. Young,<sup>f</sup> Suying Wei<sup>b,\*</sup> and Zhanhu Guo<sup>a,\*</sup>

<sup>a</sup>Integrated Composites Lab (ICL), Dan F. Smith Department of Chemical Engineering,  
Lamar University, Beaumont, TX 77710 USA

<sup>b</sup>Department of Chemistry and Biochemistry, Lamar University, Beaumont, TX 77710  
USA

<sup>c</sup>School of Chemical Engineering and Technology,  
Harbin Institute of Technology, Harbin 150001, Heilongjiang, China

<sup>d</sup>Mechanical Engineering Department, University of Wisconsin-  
Milwaukee, Milwaukee, WI 53211 USA

<sup>e</sup>Chemical Sciences and Engineering Division, Argonne National Laboratory, Argonne,  
IL, 60439 USA

<sup>f</sup>Department of Physics and Astronomy, Louisiana State University, Baton Rouge, LA  
70803 USA

\*Corresponding author

E-mail: [suying.wei@lamar.edu](mailto:suying.wei@lamar.edu) (S.W.) and [zhanhu.guo@lamar.edu](mailto:zhanhu.guo@lamar.edu) (Z.G.)

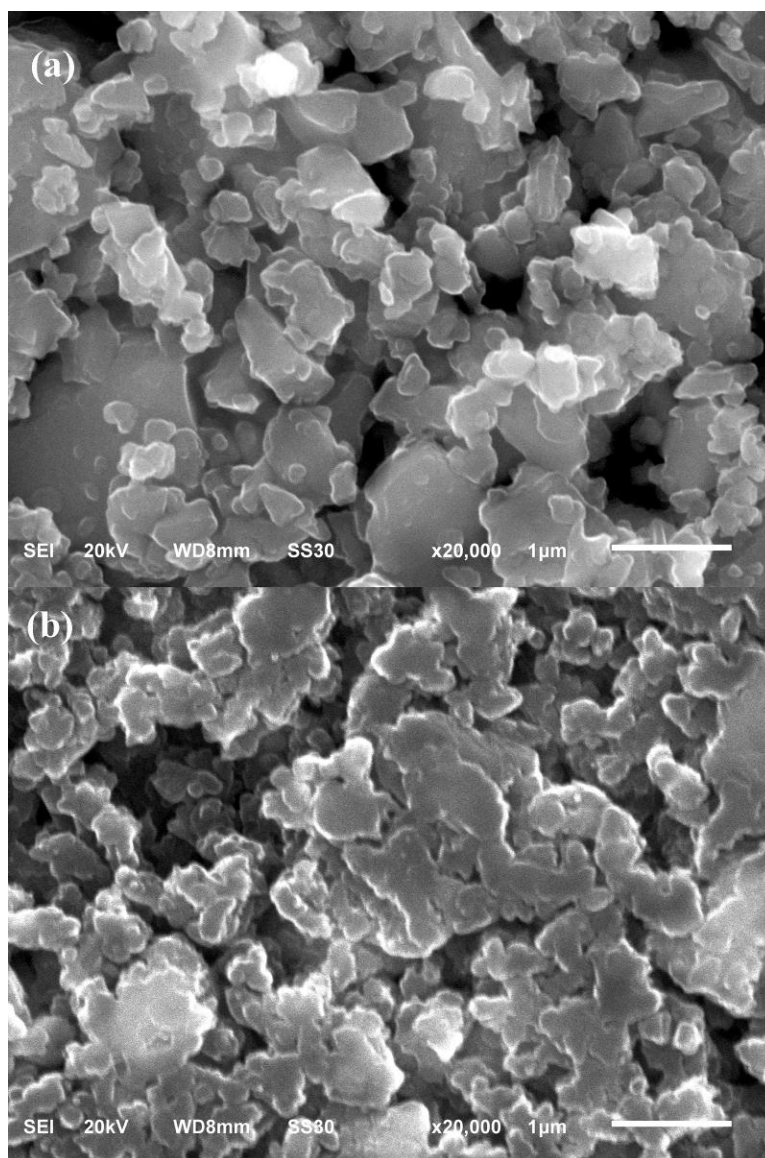

**Fig. S1** SEM images of (a) the as-received silicon and (b) silicon/PANI polymer nanocomposites with a silicon nanopowder loading of 60.0 wt%.
